# Supplementary material for: Acid-Treated Water-Soluble Chitosan Suitable for Microneedle-Assisted Intracutaneous Drug Delivery
Source: PubMed Central journal article supplement (PMC6572209; doi:10.3390/pharmaceutics11050209), 2019-05-02
Supplement: pharmaceutics-11-00209-s001.pdf [file pharmaceutics-11-00209-s001.pdf]

## Supplementary Materials

# Acid-Treated Water-Soluble Chitosan Suitable for Microneedle-Assisted Intracutaneous Drug Delivery

Ajeesh Chandrasekharan, Young Jun Hwang, Keum-Yong Seong, Samdae Park, Sodam Kim and Seung Yun Yang

### *Turbidity Measurements*

The turbidity of CS, WSCS30 and WSCS90 formed at pH6 was determined by measuring the solution turbidity with a 2100P portable turbidimeter (Hach, USA) as described in the literature [1]. 0.1w/v % of CS, WSCS30 and WSCS90 were dissolved in DI water and the pH was adjusted using 0.1 M hydrochloric acid and sodium hydroxide. The solutions were well homogenized by stirring for 10 minutes then kept idle for 30 min before measurements.

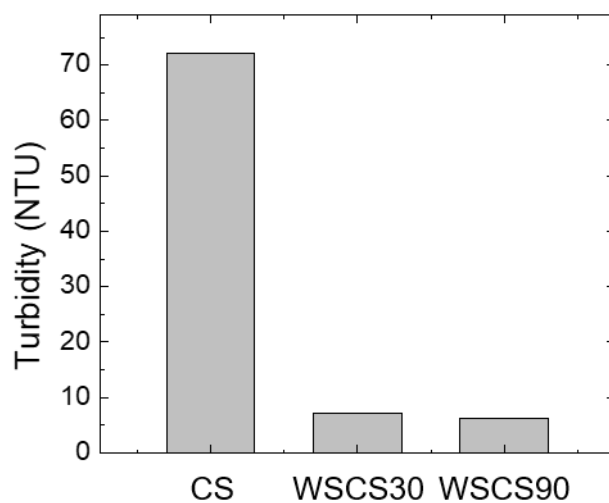

**Figure S1.** The turbidity of CS, WSCS30, and WSCS90 solutions at pH 6.

### Refernce

1. Saïed, N.; Aïder, M. Zeta potential and turbidimetry analyzes for the evaluation of chitosan/phytic acid complex formation. *J. Food Res.* **2014**, *3*, 71.
